# Supplementary material for: Identification and evaluation of ω-3 fatty acid desaturase genes for hyperfortifying α-linolenic acid in transgenic rice seed
Source: PubMed Central journal article supplement — J Exp Bot. 2012 Feb 29;63(8):3279–87. doi: 10.1093/jxb/ers051 (PMC3350935; doi:10.1093/jxb/ers051), 2012-02-29
Supplement: supp_ers051_00074021_file001.pdf [file supp_ers051_00074021_file001.pdf]

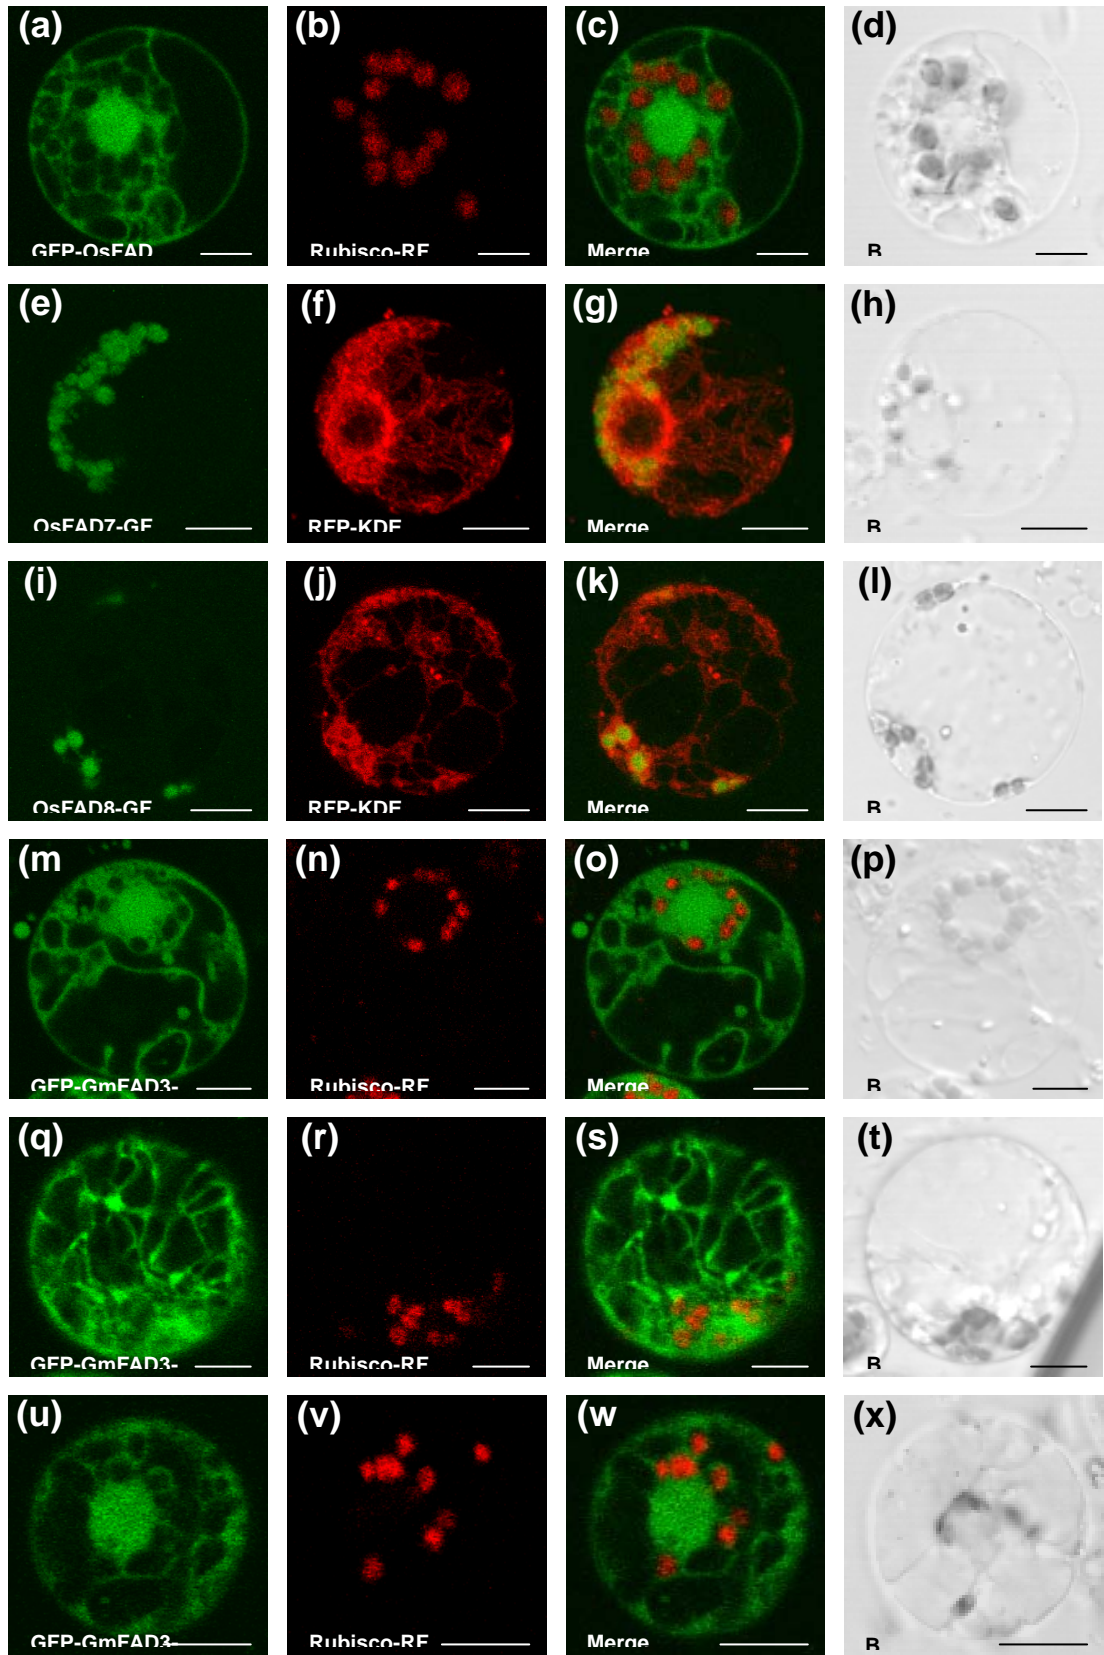

Figure S1

**Table S1** ALA content of transgenic rice seeds

| ALA Content<br>(mg g <sup>-1</sup> ) | <i>GluC</i>   | <i>Ubi-1</i>  |
|--------------------------------------|---------------|---------------|
| NT                                   |               | 0.36          |
| <i>OsFAD3</i>                        | 7.19 ± 2.03** | 5.40 ± 2.18** |
| <i>OsFAD3</i>                        | 0.56 ± 0.12** | 0.40 ± 0.04*  |
| <i>OsFAD7</i>                        | 0.42 ± 0.05** | 0.38 ± 0.04   |
| <i>GmFAD7</i>                        | 5.64 ± 2.10** | 4.65 ± 1.62** |
| <i>GmFAD8</i>                        | 0.38 ± 0.02*  | 0.37 ± 0.02   |
| <i>GmFAD8</i>                        | 0.37±0.01     | 0.37±0.01     |

*GluC*, a strong endosperm-specific glutelin promoter and *Ubi-1*, the maize ubiquitin-1 promoter promoted *OsFAD3/7/8* and *GmFAD3-1/2/3*, respectively. Each value represents the mean ± S.D. from ten independent transgenic lines. Student's t-test: \*,  $P < 0.05$ ; \*\*,  $P < 0.01$ . The NT as described in Fig. 2.
